# Supplementary material for: Levetiracetam enhances the temozolomide effect on glioblastoma stem cell proliferation and apoptosis
Source: Springer Nature journal article supplement (doi:10.1186/s12935-018-0626-8), 2018-09-10
Supplement: MOESM3 [file 16111142]

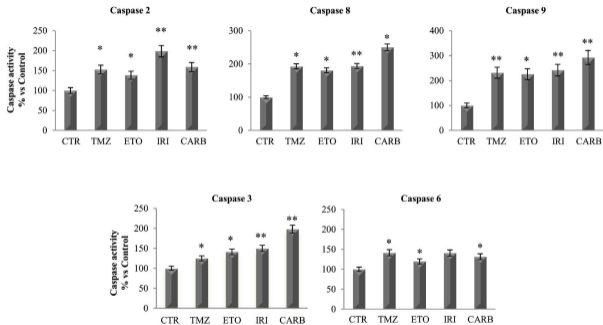

**Additional Figure 2**
